# Supplementary material for: Why Do We Agree to Disagree? Agreement and Reasons for Disagreement in Judgements of Intentional Self-Harm from Coroners and a Suicide Register in Queensland, Australia, from 2001 to 2015
Source: MDPI journal article supplement (doi:10.3390/ijerph21010052), 2023-12-30
Supplement: s1 [file s1]

**Supplementary Table S1.** The RECORD statement – checklist of items, extended from the STROBE statement, that should be reported in observational studies using routinely collected health data

|                           | Item No. | STROBE items                                                                                                                                                                                                                                                                                                                                                                                           | Location in manuscript where items are reported                     | RECORD items                                                                                                                                                                                                                                                                                                                                                                                                                                | Location in manuscript where items are reported                                                       |
|---------------------------|----------|--------------------------------------------------------------------------------------------------------------------------------------------------------------------------------------------------------------------------------------------------------------------------------------------------------------------------------------------------------------------------------------------------------|---------------------------------------------------------------------|---------------------------------------------------------------------------------------------------------------------------------------------------------------------------------------------------------------------------------------------------------------------------------------------------------------------------------------------------------------------------------------------------------------------------------------------|-------------------------------------------------------------------------------------------------------|
| <b>Title and abstract</b> |          |                                                                                                                                                                                                                                                                                                                                                                                                        |                                                                     |                                                                                                                                                                                                                                                                                                                                                                                                                                             |                                                                                                       |
|                           | 1        | (a) Indicate the study's design with a commonly used term in the title or the abstract<br>(b) Provide in the abstract an informative and balanced summary of what was done and what was found                                                                                                                                                                                                          | Page 1 - abstract<br><br>Page 1 - abstract                          | RECORD 1.1: The type of data used should be specified in the title or abstract. When possible, the name of the databases used should be included.<br><br>RECORD 1.2: If applicable, the geographic region and timeframe within which the study took place should be reported in the title or abstract.<br><br>RECORD 1.3: If linkage between databases was conducted for the study, this should be clearly stated in the title or abstract. | Page 1 - abstract<br>Page 1 - title<br><br>Page 1 - abstract                                          |
| <b>Introduction</b>       |          |                                                                                                                                                                                                                                                                                                                                                                                                        |                                                                     |                                                                                                                                                                                                                                                                                                                                                                                                                                             |                                                                                                       |
| Background rationale      | 2        | Explain the scientific background and rationale for the investigation being reported                                                                                                                                                                                                                                                                                                                   | Page 1 and 2 – Introduction                                         |                                                                                                                                                                                                                                                                                                                                                                                                                                             |                                                                                                       |
| Objectives                | 3        | State specific objectives, including any prespecified hypotheses                                                                                                                                                                                                                                                                                                                                       | Page 2 – last paragraph of the introduction                         |                                                                                                                                                                                                                                                                                                                                                                                                                                             |                                                                                                       |
| <b>Methods</b>            |          |                                                                                                                                                                                                                                                                                                                                                                                                        |                                                                     |                                                                                                                                                                                                                                                                                                                                                                                                                                             |                                                                                                       |
| Study Design              | 4        | Present key elements of study design early in the paper                                                                                                                                                                                                                                                                                                                                                | Page 2, first paragraph of 2.1. Study Design and Data Sources       |                                                                                                                                                                                                                                                                                                                                                                                                                                             |                                                                                                       |
| Setting                   | 5        | Describe the setting, locations, and relevant dates, including periods of recruitment, exposure, follow-up, and data collection                                                                                                                                                                                                                                                                        | Page 2 and 3, first paragraph of 2.1. Study Design and Data Sources |                                                                                                                                                                                                                                                                                                                                                                                                                                             |                                                                                                       |
| Participants              | 6        | (a) <i>Cohort study</i> - Give the eligibility criteria, and the sources and methods of selection of participants. Describe methods of follow-up<br><i>Case-control study</i> - Give the eligibility criteria, and the sources and methods of case ascertainment and control selection. Give the rationale for the choice of cases and controls<br><i>Cross-sectional study</i> - Give the eligibility | Not applicable<br><br>Not applicable<br><br>Not applicable          | RECORD 6.1: The methods of study population selection (such as codes or algorithms used to identify subjects) should be listed in detail. If this is not possible, an explanation should be provided.<br><br>RECORD 6.2: Any validation studies of the codes or algorithms used to select the population should be referenced. If validation was conducted for this study                                                                   | Page 2 and 3, first and second paragraphs of 2.1. Study Design and Data Sources<br><br>Not applicable |

|                          |    |                                                                                                                                                                                                                                                                                                                                                                                                                                   |                                                                                                                                                                                                |                                                                                                                                                                                                                                                                                                                            |                                                                                 |
|--------------------------|----|-----------------------------------------------------------------------------------------------------------------------------------------------------------------------------------------------------------------------------------------------------------------------------------------------------------------------------------------------------------------------------------------------------------------------------------|------------------------------------------------------------------------------------------------------------------------------------------------------------------------------------------------|----------------------------------------------------------------------------------------------------------------------------------------------------------------------------------------------------------------------------------------------------------------------------------------------------------------------------|---------------------------------------------------------------------------------|
|                          |    | <p>criteria, and the sources and methods of selection of participants</p> <p>(b) <i>Cohort study</i> - For matched studies, give matching criteria and number of exposed and unexposed</p> <p><i>Case-control study</i> - For matched studies, give matching criteria and the number of controls per case</p>                                                                                                                     | <p>Not applicable</p> <p>Not applicable</p>                                                                                                                                                    | <p>and not published elsewhere, detailed methods and results should be provided.</p> <p>RECORD 6.3: If the study involved linkage of databases, consider use of a flow diagram or other graphical display to demonstrate the data linkage process, including the number of individuals with linked data at each stage.</p> | <p>Page 5, second sentence of the results. Sentence used instead of figure.</p> |
| Variables                | 7  | Clearly define all outcomes, exposures, predictors, potential confounders, and effect modifiers. Give diagnostic criteria, if applicable.                                                                                                                                                                                                                                                                                         | Page 3 and 4                                                                                                                                                                                   | RECORD 7.1: A complete list of codes and algorithms used to classify exposures, outcomes, confounders, and effect modifiers should be provided. If these cannot be reported, an explanation should be provided.                                                                                                            | Codes and algorithms viewable in other online documents                         |
| Data sources/measurement | 8  | For each variable of interest, give sources of data and details of methods of assessment (measurement). Describe comparability of assessment methods if there is more than one group                                                                                                                                                                                                                                              | Page 4, 2 <sup>nd</sup> paragraph                                                                                                                                                              |                                                                                                                                                                                                                                                                                                                            |                                                                                 |
| Bias                     | 9  | Describe any efforts to address potential sources of bias                                                                                                                                                                                                                                                                                                                                                                         | Page 4, third paragraph                                                                                                                                                                        |                                                                                                                                                                                                                                                                                                                            |                                                                                 |
| Study size               | 10 | Explain how the study size was arrived at                                                                                                                                                                                                                                                                                                                                                                                         | Page 4, 4 <sup>th</sup> paragraph                                                                                                                                                              |                                                                                                                                                                                                                                                                                                                            |                                                                                 |
| Quantitative variables   | 11 | Explain how quantitative variables were handled in the analyses. If applicable, describe which groupings were chosen, and why                                                                                                                                                                                                                                                                                                     | Supplementary materials (logistic regression tables) and page 4, 4 <sup>th</sup> paragraph                                                                                                     |                                                                                                                                                                                                                                                                                                                            |                                                                                 |
| Statistical methods      | 12 | <p>(a) Describe all statistical methods, including those used to control for confounding</p> <p>(b) Describe any methods used to examine subgroups and interactions</p> <p>(c) Explain how missing data were addressed</p> <p>(d) <i>Cohort study</i> - If applicable, explain how loss to follow-up was addressed</p> <p><i>Case-control study</i> - If applicable, explain how matching of cases and controls was addressed</p> | <p>not applicable for confounding<br/>Page 3, 2.2. Statistical Analysis</p> <p>Not applicable</p> <p>Page 5, results, 3<sup>rd</sup> paragraph</p> <p>Not applicable</p> <p>Not applicable</p> |                                                                                                                                                                                                                                                                                                                            |                                                                                 |

|                                  |    |                                                                                                                                                                                                                                                                                                                                                 |                                                                           |                                                                                                                                                                                                                                                                                                                    |                                                           |
|----------------------------------|----|-------------------------------------------------------------------------------------------------------------------------------------------------------------------------------------------------------------------------------------------------------------------------------------------------------------------------------------------------|---------------------------------------------------------------------------|--------------------------------------------------------------------------------------------------------------------------------------------------------------------------------------------------------------------------------------------------------------------------------------------------------------------|-----------------------------------------------------------|
|                                  |    | <i>Cross-sectional study</i> - If applicable, describe analytical methods taking account of sampling strategy<br>(e) Describe any sensitivity analyses                                                                                                                                                                                          | Not applicable<br><br>Page 4, 6 <sup>th</sup> paragraph                   |                                                                                                                                                                                                                                                                                                                    |                                                           |
| Data access and cleaning methods |    | ..                                                                                                                                                                                                                                                                                                                                              |                                                                           | RECORD 12.1: Authors should describe the extent to which the investigators had access to the database population used to create the study population.<br><br>RECORD 12.2: Authors should provide information on the data cleaning methods used in the study.                                                       | Page 4, last paragraph<br><br>Page 4, last paragraph      |
| Linkage                          |    | ..                                                                                                                                                                                                                                                                                                                                              |                                                                           | RECORD 12.3: State whether the study included person-level, institutional-level, or other data linkage across two or more databases. The methods of linkage and methods of linkage quality evaluation should be provided.                                                                                          | Page 4, last paragraph                                    |
| <b>Results</b>                   |    |                                                                                                                                                                                                                                                                                                                                                 |                                                                           |                                                                                                                                                                                                                                                                                                                    |                                                           |
| Participants                     | 13 | (a) Report the numbers of individuals at each stage of the study ( <i>e.g.</i> , numbers potentially eligible, examined for eligibility, confirmed eligible, included in the study, completing follow-up, and analysed)<br>(b) Give reasons for non-participation at each stage.<br>(c) Consider use of a flow diagram                          | Page 5, first and third paragraphs of the results section                 | RECORD 13.1: Describe in detail the selection of the persons included in the study ( <i>i.e.</i> , study population selection) including filtering based on data quality, data availability and linkage. The selection of included persons can be described in the text and/or by means of the study flow diagram. | Page 5, first and third paragraphs of the results section |
| Descriptive data                 | 14 | (a) Give characteristics of study participants ( <i>e.g.</i> , demographic, clinical, social) and information on exposures and potential confounders<br>(b) Indicate the number of participants with missing data for each variable of interest<br>(c) <i>Cohort study</i> - summarise follow-up time ( <i>e.g.</i> , average and total amount) | Supplementary Tables S2 to S4.<br><br>Not indicated<br><br>Not applicable |                                                                                                                                                                                                                                                                                                                    |                                                           |
| Outcome data                     | 15 | <i>Cohort study</i> - Report numbers of outcome events or summary measures over time<br><i>Case-control study</i> - Report numbers in each exposure category, or summary measures of exposure                                                                                                                                                   | Not applicable<br><br>Not applicable                                      |                                                                                                                                                                                                                                                                                                                    |                                                           |

|                          |    |                                                                                                                                                                                                                                                                                                                                                                                                                 |                                                                                                        |                                                                                                                                                                                                                                                                                                          |                                    |
|--------------------------|----|-----------------------------------------------------------------------------------------------------------------------------------------------------------------------------------------------------------------------------------------------------------------------------------------------------------------------------------------------------------------------------------------------------------------|--------------------------------------------------------------------------------------------------------|----------------------------------------------------------------------------------------------------------------------------------------------------------------------------------------------------------------------------------------------------------------------------------------------------------|------------------------------------|
|                          |    | <i>Cross-sectional study</i> - Report numbers of outcome events or summary measures                                                                                                                                                                                                                                                                                                                             | Not applicable                                                                                         |                                                                                                                                                                                                                                                                                                          |                                    |
| Main results             | 16 | (a) Give unadjusted estimates and, if applicable, confounder-adjusted estimates and their precision (e.g., 95% confidence interval). Make clear which confounders were adjusted for and why they were included<br>(b) Report category boundaries when continuous variables were categorized<br>(c) If relevant, consider translating estimates of relative risk into absolute risk for a meaningful time period | Not applicable<br><br>Not applicable<br><br>Supplementary Table S6<br><br>Relevant, but not translated |                                                                                                                                                                                                                                                                                                          |                                    |
| Other analyses           | 17 | Report other analyses done—e.g., analyses of subgroups and interactions, and sensitivity analyses                                                                                                                                                                                                                                                                                                               | Supplementary Tables S6 and S7                                                                         |                                                                                                                                                                                                                                                                                                          |                                    |
| <b>Discussion</b>        |    |                                                                                                                                                                                                                                                                                                                                                                                                                 |                                                                                                        |                                                                                                                                                                                                                                                                                                          |                                    |
| Key results              | 18 | Summarise key results with reference to study objectives                                                                                                                                                                                                                                                                                                                                                        | Page 10 and 11, paragraphs 1 to 4 of the discussion.                                                   |                                                                                                                                                                                                                                                                                                          |                                    |
| Limitations              | 19 | Discuss limitations of the study, taking into account sources of potential bias or imprecision. Discuss both direction and magnitude of any potential bias                                                                                                                                                                                                                                                      | Page 11, 6 <sup>th</sup> paragraph                                                                     | RECORD 19.1: Discuss the implications of using data that were not created or collected to answer the specific research question(s). Include discussion of misclassification bias, unmeasured confounding, missing data, and changing eligibility over time, as they pertain to the study being reported. | Page 11, 6 <sup>th</sup> paragraph |
| Interpretation           | 20 | Give a cautious overall interpretation of results considering objectives, limitations, multiplicity of analyses, results from similar studies, and other relevant evidence                                                                                                                                                                                                                                      | Page 12, paragraphs 1 and 2                                                                            |                                                                                                                                                                                                                                                                                                          |                                    |
| Generalisability         | 21 | Discuss the generalisability (external validity) of the study results                                                                                                                                                                                                                                                                                                                                           | Page 11, 6 <sup>th</sup> paragraph                                                                     |                                                                                                                                                                                                                                                                                                          |                                    |
| <b>Other Information</b> |    |                                                                                                                                                                                                                                                                                                                                                                                                                 |                                                                                                        |                                                                                                                                                                                                                                                                                                          |                                    |
| Funding                  | 22 | Give the source of funding and the role of the funders for the present study and, if applicable, for the original study on which the present article is based                                                                                                                                                                                                                                                   | Page 12, funding statement                                                                             |                                                                                                                                                                                                                                                                                                          |                                    |

|                                                           |  |    |  |                                                                                                                                                          |                                       |
|-----------------------------------------------------------|--|----|--|----------------------------------------------------------------------------------------------------------------------------------------------------------|---------------------------------------|
| Accessibility of protocol, raw data, and programming code |  | .. |  | RECORD 22.1: Authors should provide information on how to access any supplemental information such as the study protocol, raw data, or programming code. | Page 12, data availability statement. |
|-----------------------------------------------------------|--|----|--|----------------------------------------------------------------------------------------------------------------------------------------------------------|---------------------------------------|

\*Reference: [54] Benchimol EI, Smeeth L, Guttman A, Harron K, Moher D, Petersen I, Sørensen HT, von Elm E, Langan SM, the RECORD Working Committee. The REporting of studies Conducted using Observational Routinely-collected health Data (RECORD) Statement. PLoS Medicine 2015; 12: e1001885.

\*Checklist is protected under Creative Commons Attribution ([CC BY](#)) license

**Supplementary Table S2.** Demographic characteristics, by concordance status, QSR, 2001 to 2015, people included in regressions

|                                                     | QSR and NCIS concordance |       |                                      |       |        |     |
|-----------------------------------------------------|--------------------------|-------|--------------------------------------|-------|--------|-----|
|                                                     | Agreement                |       | Disagreement (QSR ISH, NCIS not ISH) |       | Total  |     |
| Continuous variables                                | Mean                     | SD    | Mean                                 | SD    |        |     |
| Age at death                                        | 43.6                     | 17.65 | 44.8                                 | 16.38 | na     |     |
| Categorical variables                               | Number                   | %     | Number                               | %     | Number | %   |
| Sex                                                 |                          |       |                                      |       |        |     |
| Male                                                | 6580                     | 95    | 365                                  | 5     | 6945   | 100 |
| Female                                              | 1930                     | 90    | 221                                  | 10    | 2151   | 100 |
| Indigenous status                                   |                          |       |                                      |       |        |     |
| Non-Indigenous                                      | 7879                     | 93    | 564                                  | 7     | 8443   | 100 |
| Indigenous                                          | 631                      | 97    | 22                                   | 3     | 653    | 100 |
| Marital status                                      |                          |       |                                      |       |        |     |
| Never married                                       | 1260                     | 94    | 75                                   | 6     | 1335   | 100 |
| Married/De facto                                    | 3034                     | 95    | 171                                  | 5     | 3205   | 100 |
| Separated                                           | 1172                     | 96    | 55                                   | 4     | 1227   | 100 |
| Divorced                                            | 634                      | 93    | 47                                   | 7     | 681    | 100 |
| Widowed                                             | 295                      | 93    | 22                                   | 7     | 317    | 100 |
| Unknown                                             | 979                      | 87    | 141                                  | 13    | 1120   | 100 |
| Single                                              | 1136                     | 94    | 75                                   | 6     | 1211   | 100 |
| Employment status                                   |                          |       |                                      |       |        |     |
| Full-time employment                                | 1412                     | 98    | 31                                   | 2     | 1443   | 100 |
| Part-time or casual employment                      | 428                      | 98    | 11                                   | 2     | 439    | 100 |
| Employed (unknown mode)                             | 1108                     | 95    | 57                                   | 5     | 1165   | 100 |
| Unemployed                                          | 2044                     | 92    | 167                                  | 8     | 2211   | 100 |
| On disability pension                               | 560                      | 84    | 103                                  | 15    | 663    | 100 |
| Retired                                             | 1082                     | 94    | 72                                   | 6     | 1154   | 100 |
| Not in labour force <sup>1</sup>                    | 589                      | 93    | 42                                   | 7     | 631    | 100 |
| Unknown                                             | 1287                     | 93    | 103                                  | 7     | 1390   | 100 |
| Country of birth                                    |                          |       |                                      |       |        |     |
| Not Australia                                       | 1667                     | 93    | 127                                  | 7     | 1794   | 100 |
| Australia                                           | 6843                     | 94    | 459                                  | 6     | 7302   | 100 |
| Remoteness area of residential address              |                          |       |                                      |       |        |     |
| Major Cities of Australia                           | 4706                     | 93    | 360                                  | 7     | 5066   | 100 |
| Inner Regional Australia                            | 1878                     | 93    | 144                                  | 7     | 2022   | 100 |
| Outer Regional Australia                            | 1494                     | 95    | 76                                   | 5     | 1570   | 100 |
| Remote or Very Remote Australia                     | 432                      | 99    | 6                                    | 1     | 438    | 100 |
| Living arrangements                                 |                          |       |                                      |       |        |     |
| With spouse                                         | 2494                     | 95    | 133                                  | 5     | 2627   | 100 |
| With friend/relative (not parents or spouse)        | 1334                     | 94    | 86                                   | 6     | 1420   | 100 |
| With parents                                        | 1082                     | 94    | 75                                   | 6     | 1157   | 100 |
| Other shared housing (nursing home, boarding house) | 154                      | 88    | 21                                   | 12    | 175    | 100 |
| Institution (e.g. hospital or prison)               | 101                      | np    | < 10                                 | np    | np     | 100 |
| Alone                                               | 2167                     | 92    | 180                                  | 8     | 2347   | 100 |
| Homeless                                            | 41                       | 79    | 11                                   | 21    | 52     | 100 |
| Temporarily away from home                          | 116                      | np    | < 5                                  | np    | np     | 100 |
| Unknown                                             | 1021                     | 94    | 70                                   | 6     | 1091   | 100 |

np = not provided. Note that some variables required masking other values to prevent the value under 5 being derived using the row or column total. <sup>1</sup>Not in labor force refers to students and those working in the home.

**Supplementary Table S3.** Psychiatric diagnoses and treatment, by concordance status, QSR, 2001 to 2015  
**QSR and NCIS concordance concerning intentional self-harm**

| Categorical variables                                      | Agreement |    | Disagreement (QSR ISH, NCIS not ISH) |    | Total  |     |
|------------------------------------------------------------|-----------|----|--------------------------------------|----|--------|-----|
|                                                            | Number    | %  | Number                               | %  | Number | %   |
| Depression                                                 |           |    |                                      |    |        |     |
| None known                                                 | 3832      | 94 | 221                                  | 5  | 4053   | 100 |
| Depression mentioned in case                               | 1750      | 94 | 107                                  | 6  | 1857   | 100 |
| Diagnosed with                                             | 2928      | 92 | 258                                  | 8  | 3186   | 100 |
| Bipolar                                                    |           |    |                                      |    |        |     |
| None known                                                 | 8160      | 94 | 528                                  | 6  | 8688   | 100 |
| Diagnosed                                                  | 350       | 86 | 58                                   | 14 | 408    | 100 |
| Anxiety                                                    |           |    |                                      |    |        |     |
| None known                                                 | 7954      | 94 | 512                                  | 6  | 8466   | 100 |
| Diagnosed with                                             | 556       | 88 | 74                                   | 12 | 630    | 100 |
| Substance use disorder                                     |           |    |                                      |    |        |     |
| None known                                                 | 8007      | 94 | 501                                  | 6  | 8508   | 100 |
| Diagnosed with                                             | 503       | 86 | 85                                   | 14 | 588    | 100 |
| Neurocognitive disorder                                    |           |    |                                      |    |        |     |
| None known                                                 | 8399      | 94 | 560                                  | 6  | 8959   | 100 |
| Diagnosed with                                             | 111       | 81 | 26                                   | 19 | 137    | 100 |
| GP treatment for a psychiatric condition                   |           |    |                                      |    |        |     |
| Unknown                                                    | 4156      | 94 | 256                                  | 6  | 4412   | 100 |
| Yes                                                        | 2424      | 90 | 255                                  | 10 | 2679   | 100 |
| Not applicable                                             | 1930      | 96 | 75                                   | 4  | 2005   | 100 |
| Inpatient treatment for a psychiatric condition            |           |    |                                      |    |        |     |
| Yes, current                                               | 215       | 95 | 12                                   | 5  | 227    | 100 |
| Yes, past                                                  | 1020      | 90 | 107                                  | 9  | 1127   | 100 |
| Yes, unknown when                                          | 109       | 91 | 11                                   | 9  | 120    | 100 |
| No/unknown                                                 | 5229      | 93 | 381                                  | 7  | 5610   | 100 |
| Not applicable                                             | 1937      | 96 | 75                                   | 4  | 2012   | 100 |
| Outpatient treatment for a psychiatric condition           |           |    |                                      |    |        |     |
| Yes, current                                               | 941       | 91 | 88                                   | 9  | 1029   | 100 |
| Yes, past                                                  | 374       | 92 | 31                                   | 8  | 405    | 100 |
| Yes, unknown when                                          | 195       | 91 | 19                                   | 9  | 214    | 100 |
| No/unknown                                                 | 5058      | 93 | 372                                  | 7  | 5430   | 100 |
| Not applicable                                             | 1942      | 96 | 76                                   | 4  | 2018   | 100 |
| Treatment from another service for a psychiatric condition |           |    |                                      |    |        |     |
| Yes, current                                               | 671       | 93 | 50                                   | 7  | 721    | 100 |
| Yes, past                                                  | 244       | 94 | 17                                   | 6  | 261    | 100 |
| Yes, unknown when                                          | 149       | 93 | 11                                   | 7  | 160    | 100 |
| No/unknown                                                 | 5486      | 93 | 432                                  | 7  | 5918   | 100 |
| Not applicable                                             | 1960      | 96 | 76                                   | 4  | 2036   | 100 |

**Supplementary Table S4.** Suicide-related and life events predictors, by concordance status, QSR, 2001 to 2015

| Categorical variables                       | QSR and NCIS concordance |    |                                      |    |        |     |
|---------------------------------------------|--------------------------|----|--------------------------------------|----|--------|-----|
|                                             | Agreement                |    | Disagreement (QSR ISH, NCIS not ISH) |    | Total  |     |
|                                             | Number                   | %  | Number                               | %  | Number | %   |
| Intent - lifetime                           |                          |    |                                      |    |        |     |
| Once or twice                               | 2504                     | 95 | 138                                  | 5  | 2642   | 100 |
| Several times                               | 1286                     | 95 | 61                                   | 5  | 1347   | 100 |
| No                                          | 1832                     | 95 | 88                                   | 5  | 1920   | 100 |
| Unknown                                     | 2888                     | 91 | 299                                  | 9  | 3187   | 100 |
| Intent – year                               |                          |    |                                      |    |        |     |
| Once or twice                               | 2202                     | 95 | 107                                  | 5  | 2309   | 100 |
| Several times                               | 934                      | 97 | 33                                   | 3  | 967    | 100 |
| No                                          | 2090                     | 95 | 106                                  | 5  | 2196   | 100 |
| Unknown                                     | 3284                     | 91 | 340                                  | 9  | 3624   | 100 |
| Suicide attempt - lifetime                  |                          |    |                                      |    |        |     |
| Once or twice                               | 1889                     | 94 | 127                                  | 6  | 2016   | 100 |
| Several times (3 to 9)                      | 370                      | 92 | 32                                   | 8  | 402    | 100 |
| Numerous times (10+)                        | 36                       | np | < 5                                  | np | np     | 100 |
| Yes (unknown times)                         | 161                      | 88 | 21                                   | 11 | 182    | 100 |
| Yes (multiple but unknown times)            | 105                      | np | < 20                                 | np | np     | 100 |
| No                                          | 3191                     | 88 | 124                                  | 4  | 3315   | 100 |
| Unknown                                     | 2758                     | 91 | 264                                  | 9  | 3022   | 100 |
| Suicide attempt – year                      |                          |    |                                      |    |        |     |
| Once or twice                               | 1246                     | 94 | 82                                   | 6  | 1328   | 100 |
| Three or more times                         | 168                      | 94 | 11                                   | 6  | 179    | 100 |
| Yes (unknown times)                         | 84                       | np | < 10                                 | np | np     | 100 |
| Yes (multiple but unknown times)            | 21                       | np | < 5                                  | np | np     | 100 |
| Unknown                                     | 3096                     | 91 | 315                                  | 9  | 3411   | 100 |
| No                                          | 3895                     | 96 | 170                                  | 4  | 4065   | 100 |
| Alcohol consumed before suicide             |                          |    |                                      |    |        |     |
| No                                          | 4534                     | 93 | 341                                  | 7  | 4875   | 100 |
| Yes                                         | 3072                     | 94 | 187                                  | 6  | 3259   | 100 |
| Unknown                                     | 904                      | 94 | 58                                   | 6  | 962    | 100 |
| Life event – relationship problems          |                          |    |                                      |    |        |     |
| None known                                  | 5273                     | 92 | 454                                  | 8  | 5727   | 100 |
| Conflict                                    | 1172                     | 96 | 49                                   | 4  | 1221   | 100 |
| Separation                                  | 2065                     | 96 | 83                                   | 4  | 2148   | 100 |
| Life event – sexual abuse                   |                          |    |                                      |    |        |     |
| No                                          | 8348                     | 94 | 580                                  | 6  | 8928   | 100 |
| Yes                                         | 162                      | 96 | 6                                    | 4  | 168    | 100 |
| Life event – relationship conflict          |                          |    |                                      |    |        |     |
| None known                                  | 7359                     | 93 | 528                                  | 7  | 7887   | 100 |
| Familial                                    | 747                      | 95 | 40                                   | 5  | 787    | 100 |
| Interpersonal                               | 404                      | 96 | 18                                   | 4  | 422    | 100 |
| Life event – recent or pending unemployment |                          |    |                                      |    |        |     |
| No                                          | 7767                     | 93 | 552                                  | 7  | 8319   | 100 |
| Yes                                         | 743                      | 96 | 34                                   | 4  | 777    | 100 |
| Suicide note                                |                          |    |                                      |    |        |     |
| No                                          | 5037                     | 90 | 508                                  | 9  | 5545   | 100 |
| Yes                                         | 3172                     | 99 | 45                                   | 1  | 3217   | 100 |
| Unknown                                     | 301                      | 90 | 33                                   | 10 | 334    | 100 |

np = not provided. Note that some variables required masking values of 5 or more to prevent the value under 5 being derived using the row total.

**Supplementary Table S5.** Binary logistic regression with fractional polynomial terms for age and incident year

|                                                     | OR   | SE   | Z     | P value | 95% CI<br>LL | 95% CI<br>UL | Sig level |
|-----------------------------------------------------|------|------|-------|---------|--------------|--------------|-----------|
| Age                                                 |      |      |       |         |              |              |           |
| Fractional polynomial term 1                        | 1.39 | 0.30 | 1.51  | 0.13    | 0.91         | 2.13         |           |
| Fractional polynomial term 2                        | 0.91 | 0.06 | -1.54 | 0.12    | 0.80         | 1.03         |           |
| Incident year                                       |      |      |       |         |              |              |           |
| Fractional polynomial term 1                        | 1.01 | 0.01 | 0.65  | 0.52    | 0.98         | 1.03         |           |
| Sex                                                 |      |      |       |         |              |              |           |
| Male                                                | 1    | .    | .     | .       | .            | .            |           |
| Female                                              | 1.94 | 0.20 | 6.45  | < 0.001 | 1.58         | 2.37         | ***       |
| Indigenous status                                   |      |      |       |         |              |              |           |
| Non-Indigenous                                      | 1    | .    | .     | .       | .            | .            |           |
| Indigenous                                          | 0.61 | 0.15 | -2.07 | 0.04    | 0.38         | 0.97         | *         |
| Country of birth                                    |      |      |       |         |              |              |           |
| Australia                                           | 1    | .    | .     | .       | .            | .            |           |
| Elsewhere                                           | 1.19 | 0.14 | 1.49  | 0.14    | 0.95         | 1.49         |           |
| Marital status                                      |      |      |       |         |              |              |           |
| Married/De facto                                    | 1    | .    | .     | .       | .            | .            |           |
| Never married                                       | 0.83 | 0.17 | -0.92 | 0.36    | 0.55         | 1.24         |           |
| Separated                                           | 0.79 | 0.17 | -1.10 | 0.27    | 0.51         | 1.21         |           |
| Divorced                                            | 0.88 | 0.20 | -0.58 | 0.56    | 0.56         | 1.36         |           |
| Widowed                                             | 0.87 | 0.26 | -0.48 | 0.63    | 0.48         | 1.55         |           |
| Unknown                                             | 1.44 | 0.27 | 1.97  | 0.05    | 1.00         | 2.07         | *         |
| Single                                              | 0.89 | 0.19 | -0.57 | 0.57    | 0.58         | 1.34         |           |
| Remoteness area of residential address              |      |      |       |         |              |              |           |
| Major Cities of Australia                           | 1    | .    | .     | .       | .            | .            |           |
| Inner Regional Australia                            | 1.19 | 0.13 | 1.53  | 0.13    | 0.95         | 1.48         |           |
| Outer Regional Australia                            | 0.79 | 0.11 | -1.71 | 0.09    | 0.60         | 1.04         |           |
| Remote or Very Remote Australia                     | 0.25 | 0.11 | -3.24 | < 0.001 | 0.11         | 0.57         | **        |
| Employment status                                   |      |      |       |         |              |              |           |
| Unemployed                                          | 1    | .    | .     | .       | .            | .            |           |
| Full-time employment                                | 0.40 | 0.08 | -4.33 | < 0.001 | 0.26         | 0.61         | ***       |
| Part-time/casual employment                         | 0.40 | 0.13 | -2.80 | 0.01    | 0.21         | 0.76         | **        |
| Employed (unknown mode)                             | 0.74 | 0.13 | -1.73 | 0.08    | 0.53         | 1.04         |           |
| On disability pension                               | 1.85 | 0.29 | 3.99  | < 0.001 | 1.37         | 2.50         | ***       |
| Retired                                             | 1    | 0.22 | 0.02  | 0.99    | 0.66         | 1.54         |           |
| Other not in labour force                           | 0.95 | 0.19 | -0.25 | 0.80    | 0.64         | 1.41         |           |
| Unknown                                             | 0.89 | 0.13 | -0.82 | 0.41    | 0.66         | 1.18         |           |
| Living arrangements                                 |      |      |       |         |              |              |           |
| With spouse                                         | 1    | .    | .     | .       | .            | .            |           |
| With friend/relative (not parents or spouse)        | 1.37 | 0.28 | 1.54  | 0.12    | 0.92         | 2.06         |           |
| With parents                                        | 1.46 | 0.33 | 1.65  | 0.10    | 0.93         | 2.28         |           |
| Other shared housing (nursing home, boarding house) | 2.23 | 0.68 | 2.63  | 0.01    | 1.23         | 4.05         | **        |
| Institution (e.g., hospital or prison)              | 0.97 | 0.48 | -0.07 | 0.94    | 0.37         | 2.54         |           |
| Alone                                               | 1.70 | 0.33 | 2.77  | 0.01    | 1.17         | 2.49         | **        |
| Homeless                                            | 4.19 | 1.74 | 3.45  | < 0.001 | 1.86         | 9.45         | ***       |
| Temporarily away from home                          | .83  | 0.46 | -0.34 | 0.73    | 0.28         | 2.43         |           |
| Unknown                                             | 1.03 | 0.22 | 0.15  | 0.88    | 0.68         | 1.56         |           |
| Depression                                          |      |      |       |         |              |              |           |
| No                                                  | 1    | .    | .     | .       | .            | .            |           |
| Depression mentioned                                | 0.96 | 0.14 | -0.27 | 0.79    | 0.72         | 1.28         |           |
| Diagnosed with                                      | 1.25 | 0.16 | 1.80  | 0.07    | 0.98         | 1.60         |           |
| Bipolar                                             |      |      |       |         |              |              |           |

|                                                           |      |      |       |         |      |      |     |
|-----------------------------------------------------------|------|------|-------|---------|------|------|-----|
| None known                                                | 1    | .    | .     | .       | .    | .    |     |
| Diagnosed                                                 | 1.93 | .37  | 3.39  | < 0.001 | 1.32 | 2.82 | *** |
| Anxiety                                                   |      |      |       |         |      |      |     |
| None known                                                | 1    | .    | .     | .       | .    | .    |     |
| Diagnosed with                                            | 1.32 | 0.2  | 1.80  | 0.07    | 0.98 | 1.79 |     |
| Substance abuse                                           |      |      |       |         |      |      |     |
| None known                                                | 1    | .    | .     | .       | .    | .    |     |
| Yes                                                       | 1.84 | 0.27 | 4.09  | < 0.001 | 1.37 | 2.47 | *** |
| Dementia                                                  |      |      |       |         |      |      |     |
| None known                                                | 1    | .    | .     | .       | .    | .    |     |
| Dementia                                                  | 3.67 | .91  | 5.24  | < 0.001 | 2.26 | 5.97 | *** |
| Lifetime GP treatment for a psychiatric condition         |      |      |       |         |      |      |     |
| None known                                                | 1    | .    | .     | .       | .    | .    |     |
| Yes                                                       | 1.41 | .16  | 3.08  | 0.002   | 1.13 | 1.77 | **  |
| Not applicable                                            | 1.37 | .72  | 0.60  | 0.55    | 0.49 | 3.83 |     |
| Lifetime inpatient treatment for a psychiatric condition  |      |      |       |         |      |      |     |
| None known                                                | 1    | .    | .     | .       | .    | .    |     |
| Yes, current                                              | 0.59 | 0.20 | -1.56 | 0.12    | 0.30 | 1.15 |     |
| Yes, past                                                 | 1.01 | 0.14 | 0.06  | 0.95    | 0.77 | 1.33 |     |
| Yes, unknown when                                         | 1.21 | 0.43 | 0.55  | 0.58    | 0.61 | 2.43 |     |
| Not applicable                                            | 0.74 | 0.61 | -0.37 | 0.71    | 0.14 | 3.75 |     |
| Lifetime outpatient treatment for a psychiatric condition |      |      |       |         |      |      |     |
| None known                                                | 1    | .    | .     | .       | .    | .    |     |
| Yes, current                                              | 0.92 | 0.13 | -0.56 | 0.58    | 0.70 | 1.22 |     |
| Yes, past                                                 | 0.99 | 0.22 | -0.02 | 0.98    | 0.65 | 1.53 |     |
| Yes, unknown when                                         | 0.88 | 0.25 | -0.45 | 0.65    | 0.51 | 1.52 |     |
| Not applicable                                            | 0.96 | 0.72 | -0.05 | 0.96    | 0.22 | 4.20 |     |
| Other lifetime treatment for a psychiatric condition      |      |      |       |         |      |      |     |
| None known                                                | 1    | .    | .     | .       | .    | .    |     |
| Yes, current                                              | 0.79 | 0.13 | -1.39 | 0.17    | 0.56 | 1.10 |     |
| Yes, past                                                 | 0.69 | 0.20 | -1.28 | 0.20    | 0.40 | 1.22 |     |
| Yes, unknown when                                         | 0.68 | 0.23 | -1.13 | 0.26    | 0.35 | 1.33 |     |
| Not applicable                                            | 1.09 | 0.85 | 0.12  | 0.91    | 0.24 | 4.98 |     |
| Lifetime intent                                           |      |      |       |         |      |      |     |
| Unknown                                                   | 1    | .    | .     | .       | .    | .    |     |
| Once or twice                                             | 1.01 | 0.18 | 0.07  | 0.94    | 0.71 | 1.44 |     |
| Several times                                             | 0.94 | 0.23 | -0.27 | 0.78    | 0.58 | 1.51 |     |
| No                                                        | 0.72 | 0.20 | -1.19 | 0.23    | 0.42 | 1.23 |     |
| 12-month intent                                           |      |      |       |         |      |      |     |
| Unknown                                                   | 1    | .    | .     | .       | .    | .    |     |
| Once or twice                                             | 0.61 | 0.11 | -2.62 | 0.01    | 0.42 | 0.88 | **  |
| Several times                                             | 0.44 | 0.13 | -2.76 | 0.01    | 0.25 | 0.79 | **  |
| No                                                        | 1.11 | 0.28 | 0.43  | 0.67    | 0.68 | 1.81 |     |
| Lifetime suicide attempt                                  |      |      |       |         |      |      |     |
| No                                                        | 1    | .    | .     | .       | .    | .    |     |
| Once or twice                                             | 1.12 | 0.23 | 0.57  | .57     | .76  | 1.67 |     |
| Several times (3-9)                                       | 1.24 | 0.37 | 0.70  | .48     | .69  | 2.22 |     |
| Numerous times (10 or more)                               | 1.15 | 0.78 | 0.20  | .84     | .3   | 4.37 |     |
| Yes (unknown times)                                       | 1.57 | 0.54 | 1.31  | .19     | .8   | 3.06 |     |
| Yes (multiple but unknown times)                          | 1.52 | 0.60 | 1.05  | .29     | .7   | 3.3  |     |
| Unknown                                                   | 1.35 | .31  | 1.31  | .19     | .86  | 2.13 |     |
| 12-month suicide attempt                                  |      |      |       |         |      |      |     |
| No                                                        | 1    | .    | .     | .       | .    | .    |     |
| Once or twice                                             | 1.14 | 0.24 | 0.63  | 0.53    | 0.76 | 1.71 |     |
| Three or more times                                       | 0.87 | 0.37 | -0.32 | 0.75    | 0.38 | 1.99 |     |
| Yes (unknown times)                                       | 0.87 | 0.45 | -0.28 | 0.78    | 0.32 | 2.37 |     |

|                                  |      |         |                      |         |         |      |     |
|----------------------------------|------|---------|----------------------|---------|---------|------|-----|
| Yes (multiple but unknown times) | 1.02 | 0.86    | 0.02                 | 0.98    | 0.19    | 5.38 |     |
| Unknown                          | 1.29 | 0.26    | 1.26                 | 0.21    | 0.87    | 1.93 |     |
| Alcohol consumed before death    |      |         |                      |         |         |      |     |
| No                               | 1    | .       | .                    | .       | .       | .    |     |
| Yes                              | 1.01 | 0.11    | -0.02                | 0.98    | 0.81    | 1.23 |     |
| Unknown                          | 0.85 | 0.13    | -1.06                | 0.29    | 0.62    | 1.15 |     |
| Relationship problems            |      |         |                      |         |         |      |     |
| None known                       | 1    | .       | .                    | .       | .       | .    |     |
| Conflict                         | 0.71 | 0.12    | -1.96                | 0.05    | 0.50    | 1.00 | *   |
| Separation                       | 0.71 | 0.11    | -2.24                | 0.02    | 0.53    | 0.96 | *   |
| Experienced sexual abuse         |      |         |                      |         |         |      |     |
| None known                       | 1    | .       | .                    | .       | .       | .    |     |
| Yes                              | 0.46 | 0.20    | -1.78                | 0.08    | 0.19    | 1.08 |     |
| Conflict                         |      |         |                      |         |         |      |     |
| None known                       | 1    | .       | .                    | .       | .       | .    |     |
| Familial                         | 0.75 | 0.14    | -1.56                | 0.12    | 0.53    | 1.08 |     |
| Interpersonal                    | 0.70 | 0.18    | -1.36                | 0.17    | 0.42    | 1.17 |     |
| Recent or pending unemployment   |      |         |                      |         |         |      |     |
| None known                       | 1    | .       | .                    | .       | .       | .    |     |
| Yes                              | 0.72 | 0.14    | -1.64                | 0.10    | 0.49    | 1.07 |     |
| Suicide note left                |      |         |                      |         |         |      |     |
| No                               | 1    | .       | .                    | .       | .       | .    |     |
| Yes                              | 0.14 | 0.02    | -12.23               | < 0.001 | 0.10    | 0.19 | *** |
| Unknown                          | 0.96 | 0.19    | -0.23                | 0.82    | 0.64    | 1.42 |     |
| Constant                         | 0.06 | 0.01    | -12.23               | 0       | 0.04    | .1   | *** |
| <hr/>                            |      |         |                      |         |         |      |     |
| Mean dependent var               |      | 0.06    | SD dependent var     |         | 0.25    |      |     |
| Pseudo r-squared                 |      | 0.18    | Number of obs        |         | 9096    |      |     |
| Chi-square                       |      | 792.94  | Prob > chi2          |         | 0.00    |      |     |
| Akaike crit. (AIC)               |      | 3710.41 | Bayesian crit. (BIC) |         | 4265.43 |      |     |

\*\*\*  $p < 0.001$ , \*\*  $p < 0.01$ , \*  $p < 0.05$ . Age at death term 1 =  $(\text{age at death}/10)^{.5-2.088809864}$ . Age at death term 2 =  $(\text{age at death}/10)^{.5*\ln(X)-3.077211552}$ . Both age terms were multiplied by 10 after estimation to improve the scaling of the odds ratios. Incident year was incident year-2008.380057.

**Supplementary Table S6.** Sensitivity analysis, with binary logistic regression with 5-knot restricted cubic splines for age and incident year

|                                                     | OR   | SE   | Z     | <i>P value</i> | 95% CI LL | 95% CI UL | Sig level |
|-----------------------------------------------------|------|------|-------|----------------|-----------|-----------|-----------|
| Age at death                                        |      |      |       |                |           |           |           |
| RCS 1                                               | 1.03 | .026 | 1.30  | 0.19           | 0.98      | 1.08      |           |
| RCS 2                                               | 0.83 | .162 | -0.97 | 0.33           | 0.56      | 1.22      |           |
| RCS 3                                               | 1.59 | .981 | 0.75  | 0.46           | 0.47      | 5.33      |           |
| RCS 4                                               | 0.72 | .471 | -0.50 | 0.62           | 0.20      | 2.60      |           |
| Incident year                                       |      |      |       |                |           |           |           |
| RCS 1                                               | 1.11 | 0.10 | 1.22  | 0.22           | 0.94      | 1.32      |           |
| RCS 2                                               | 1.04 | 0.37 | 0.11  | 0.91           | 0.52      | 2.09      |           |
| RCS 3                                               | 0.55 | 0.61 | -0.54 | 0.59           | 0.06      | 4.87      |           |
| RCS 4                                               | 3.19 | 6.24 | 0.59  | 0.55           | 0.07      | 146.9     |           |
| Sex                                                 |      |      |       |                |           |           |           |
| Male                                                | 1    | .    | .     | .              | .         | .         |           |
| Female                                              | 1.93 | .198 | 6.38  | < 0.001        | 1.57      | 2.36      | ***       |
| Indigenous status                                   |      |      |       |                |           |           |           |
| Non-Indigenous                                      | 1    | .    | .     | .              | .         | .         |           |
| Indigenous                                          | 0.62 | 0.15 | -1.95 | 0.05           | 0.39      | 1.00      |           |
| Country of birth                                    |      |      |       |                |           |           |           |
| Australia                                           | 1    | .    | .     | .              | .         | .         |           |
| Elsewhere                                           | 1.18 | 0.14 | 1.46  | 0.14           | 0.94      | 1.48      |           |
| Marital status                                      |      |      |       |                |           |           |           |
| Married/De facto                                    | 1    | .    | .     | .              | .         | .         |           |
| Never married                                       | 0.87 | 0.18 | -0.65 | 0.52           | 0.58      | 1.31      |           |
| Separated                                           | 0.77 | 0.17 | -1.18 | 0.24           | 0.50      | 1.19      |           |
| Divorced                                            | 0.88 | 0.20 | -0.57 | 0.57           | 0.56      | 1.37      |           |
| Widowed                                             | 0.82 | 0.25 | -0.66 | 0.51           | 0.46      | 1.48      |           |
| Unknown                                             | 1.37 | 0.26 | 1.67  | 0.09           | 0.95      | 1.97      |           |
| Single                                              | 0.83 | 0.18 | -0.86 | 0.39           | 0.55      | 1.26      |           |
| Remoteness area of residential address              |      |      |       |                |           |           |           |
| Major Cities of Australia                           | 1    | .    | .     | .              | .         | .         |           |
| Inner Regional Australia                            | 1.16 | 0.13 | 1.28  | 0.20           | 0.93      | 1.44      |           |
| Outer Regional Australia                            | 0.78 | 0.11 | -1.81 | 0.07           | 0.59      | 1.02      |           |
| Remote or Very Remote                               | 0.24 | 0.11 | -3.26 | 0.001          | 0.11      | 0.57      | **        |
| Australia                                           |      |      |       |                |           |           |           |
| Employment status                                   |      |      |       |                |           |           |           |
| Unemployed                                          | 1    | .    | .     | .              | .         | .         |           |
| Full-time employment                                | 0.43 | 0.09 | -4.01 | < 0.001        | 0.28      | 0.65      | ***       |
| Part-time/casual employment                         | 0.43 | 0.14 | -2.56 | 0.01           | 0.23      | 0.82      | *         |
| Employed (unknown mode)                             | 0.69 | 0.12 | -2.12 | .034           | 0.49      | 0.97      | *         |
| On disability pension                               | 1.90 | .295 | 4.15  | < 0.001        | 1.40      | 2.58      | ***       |
| Retired                                             | 1.01 | .225 | 0.05  | 0.96           | 0.65      | 1.56      |           |
| Other not in labour force                           | 1.00 | .204 | -0.01 | 0.99           | 0.67      | 1.49      |           |
| Unknown                                             | .893 | .132 | -0.76 | .445           | 0.66      | 1.19      |           |
| Living arrangements                                 |      |      |       |                |           |           |           |
| With spouse                                         | 1    | .    | .     | .              | .         | .         |           |
| With friend/relative                                | 1.45 | 0.30 | 1.77  | 0.08           | 0.96      | 2.18      |           |
| With parents                                        | 1.52 | 0.35 | 1.84  | 0.07           | 0.97      | 2.39      |           |
| Other shared housing (nursing home, boarding house) | 2.23 | 0.69 | 2.61  | 0.01           | 1.22      | 4.08      | **        |
| Institution (e.g., hospital, prison)                | 0.98 | 0.48 | -0.04 | 0.96           | 0.37      | 2.59      |           |
| Alone                                               | 1.79 | 0.35 | 2.99  | 0.003          | 1.22      | 2.62      | **        |
| Homeless                                            | 4.18 | 1.74 | 3.43  | 0.001          | 1.85      | 9.47      | ***       |
| Temporarily away from home                          | 0.89 | 0.49 | -0.22 | 0.83           | 0.30      | 2.61      |           |

|                                                           |      |      |       |         |       |       |     |
|-----------------------------------------------------------|------|------|-------|---------|-------|-------|-----|
| Unknown                                                   | 1.07 | 0.23 | 0.34  | 0.74    | 0.71  | 1.63  |     |
| Depression                                                |      |      |       |         |       |       |     |
| No                                                        | 1    | .    | .     | .       | .     | .     |     |
| Depression mentioned                                      | 0.94 | 0.14 | -0.40 | 0.69    | 0.71  | 1.26  |     |
| Diagnosed with                                            | 1.18 | 0.15 | 1.32  | 0.19    | 0.9   | 1.51  |     |
| Bipolar                                                   |      |      |       |         |       |       |     |
| None known                                                | 1    | .    | .     | .       | .     | .     |     |
| Diagnosed with                                            | 1.88 | 0.36 | 3.23  | 0.001   | 1.28  | 2.75  | **  |
| Anxiety                                                   |      |      |       |         |       |       |     |
| None known                                                | 1    | .    | .     | .       | .     | .     |     |
| Diagnosed with                                            | 1.36 | 0.21 | 1.99  | 0.05    | 1.01  | 1.85  | *   |
| Substance abuse                                           |      |      |       |         |       |       |     |
| None known                                                | 1    | .    | .     | .       | .     | .     |     |
| Yes                                                       | 1.83 | 0.27 | 4.04  | < 0.001 | 1.37  | 2.46  | *** |
| Dementia                                                  |      |      |       |         |       |       |     |
| None known                                                | 1    | .    | .     | .       | .     | .     |     |
| Diagnosed with                                            | 3.75 | 0.94 | 5.28  | < 0.001 | 2.298 | 6.134 | *** |
| Lifetime GP treatment for a psychiatric condition         |      |      |       |         |       |       |     |
| None known                                                | 1    | .    | .     | .       | .     | .     |     |
| Yes                                                       | 1.41 | 0.16 | 3.03  | 0.002   | 1.13  | 1.76  | **  |
| Not applicable                                            | 1.35 | 0.71 | 0.57  | 0.57    | 0.48  | 3.81  |     |
| Lifetime inpatient treatment                              |      |      |       |         |       |       |     |
| None known                                                | 1    | .    | .     | .       | .     | .     |     |
| Yes, current                                              | 0.63 | 0.22 | -1.35 | 0.18    | 0.32  | 1.23  |     |
| Yes, past                                                 | 1.00 | 0.14 | -0.01 | 1.00    | 0.76  | 1.32  |     |
| Yes, unknown when                                         | 1.39 | 0.50 | 0.93  | 0.35    | 0.69  | 2.80  |     |
| Not applicable                                            | 0.78 | 0.64 | -0.30 | 0.76    | 0.15  | 3.95  |     |
| Lifetime outpatient treatment for a psychiatric condition |      |      |       |         |       |       |     |
| None known                                                | 1    | .    | .     | .       | .     | .     |     |
| Yes, current                                              | 0.86 | 0.12 | -1.04 | 0.30    | 0.65  | 1.14  |     |
| Yes, past                                                 | 0.98 | 0.21 | -0.10 | 0.92    | 0.64  | 1.50  |     |
| Yes, unknown when                                         | 0.92 | 0.26 | -0.29 | 0.77    | 0.53  | 1.59  |     |
| Other lifetime treatment for a psychiatric condition      |      |      |       |         |       |       |     |
| None known                                                | 1    | .    | .     | .       | .     | .     |     |
| Not applicable                                            | 0.93 | 0.70 | -0.10 | 0.92    | 0.02  | 4.07  |     |
| Yes, current                                              | 0.80 | 0.14 | -1.32 | 0.19    | 0.57  | 1.12  |     |
| Yes, past                                                 | 0.73 | 0.21 | -1.11 | 0.27    | 0.42  | 1.28  |     |
| Yes, unknown when                                         | 0.75 | 0.25 | -0.84 | 0.40    | 0.38  | 1.46  |     |
| Not applicable                                            | 0.99 | 0.77 | -0.01 | 0.99    | 0.22  | 4.50  |     |
| Lifetime intent                                           |      |      |       |         |       |       |     |
| Unknown                                                   | 1    | .    | .     | .       | .     | .     |     |
| Once or twice                                             | 1.01 | 0.18 | 0.07  | 0.95    | 0.71  | 1.44  |     |
| Several times                                             | 0.89 | 0.22 | -0.46 | 0.65    | 0.55  | 1.45  |     |
| No                                                        | 0.73 | 0.20 | -1.13 | 0.26    | 0.42  | 1.26  |     |
| 12-month intent                                           |      |      |       |         |       |       |     |
| Unknown                                                   | 1    | .    | .     | .       | .     | .     |     |
| Once or twice                                             | 0.63 | 0.12 | -2.48 | 0.01    | 0.43  | 0.91  | *   |
| Several times                                             | 0.48 | 0.14 | -2.47 | 0.01    | 0.27  | 0.86  | *   |
| No                                                        | 1.16 | 0.29 | 0.59  | 0.56    | 0.71  | 1.91  |     |
| Lifetime suicide attempt                                  |      |      |       |         |       |       |     |
| No                                                        | 1    | .    | .     | .       | .     | .     |     |
| Once or twice                                             | 1.14 | 0.23 | 0.65  | 0.52    | 0.77  | 1.69  |     |
| Several times (3-9)                                       | 1.24 | 0.37 | 0.72  | 0.47    | 0.69  | 2.24  |     |
| Numerous times (10 or more)                               | 1.16 | 0.80 | 0.22  | 0.83    | 0.30  | 4.48  |     |
| Yes (unknown times)                                       | 1.60 | 0.55 | 1.37  | 0.17    | 0.82  | 3.13  |     |
| Yes (multiple but unknown times)                          | 1.43 | 0.57 | 0.89  | 0.37    | 0.65  | 3.12  |     |
| Unknown                                                   | 1.40 | 0.33 | 1.42  | 0.16    | 0.88  | 2.21  |     |

|                                  |      |          |                      |        |          |           |
|----------------------------------|------|----------|----------------------|--------|----------|-----------|
| 12-month suicide attempt         |      |          |                      |        |          |           |
| No                               | 1    | .        | .                    | .      | .        | .         |
| Once or twice                    | 1.15 | 0.24     | 0.66                 | 0.51   | 0.76     | 1.72      |
| Three or more times              | 0.89 | 0.37     | -0.29                | 0.77   | 0.39     | 2.02      |
| Yes (unknown times)              | 0.93 | 0.48     | -0.15                | 0.88   | 0.34     | 2.55      |
| Yes (multiple but unknown times) | 1.17 | 0.99     | 0.18                 | 0.86   | 0.22     | 6.11      |
| Unknown                          | 1.26 | 0.26     | 1.12                 | 0.26   | 0.84     | 1.89      |
| Alcohol consumed before death    |      |          |                      |        |          |           |
| No                               | 1    | .        | .                    | .      | .        | .         |
| Yes                              | 1.00 | 0.10     | 0.04                 | 0.97   | 0.83     | 1.24      |
| Unknown                          | 0.88 | 0.14     | -0.77                | 0.04   | 0.64     | 1.21      |
| Relationship problems            |      |          |                      |        |          |           |
| None known                       | 1    | .        | .                    | .      | .        | .         |
| Conflict                         | 0.72 | 0.13     | -1.86                | 0.06   | 0.51     | 1.02      |
| Separation                       | 0.72 | 0.11     | -2.22                | 0.03   | 0.53     | 0.96      |
| Experienced sexual abuse         |      |          |                      |        |          |           |
| None known                       | 1    | .        | .                    | .      | .        | .         |
| Yes                              | 0.46 | 0.20     | -1.76                | 0.08   | 0.19     | 1.09      |
| Conflict                         |      |          |                      |        |          |           |
| None known                       | 1    | .        | .                    | .      | .        | .         |
| Familial                         | 0.76 | 0.14     | -1.48                | 0.14   | 0.53     | 1.09      |
| Interpersonal                    | 0.72 | 0.19     | -1.27                | 0.20   | 0.43     | 1.20      |
| Recent or pending unemployment   |      |          |                      |        |          |           |
| None known                       | 1    | .        | .                    | .      | .        | .         |
| Yes                              | 0.76 | 0.15     | -1.35                | 0.18   | 0.52     | 1.13      |
| Suicide note left                |      |          |                      |        |          |           |
| No                               | 1    | .        | .                    | .      | .        | .         |
| Yes                              | 0.14 | 0.02     | -12.17               | <0.001 | 0.10     | 0.19      |
| Unknown                          | 1.03 | 0.21     | 0.12                 | 0.90   | 0.69     | 1.53      |
| Constant                         | 0    | 0        | -1.25                | 0.21   | 0        | 6.888e+53 |
| Mean dependent var               |      |          |                      |        |          |           |
|                                  |      | 0.064    | SD dependent var     |        | 0.246    |           |
| Pseudo r-squared                 |      | 0.187    | Number of obs        |        | 9096     |           |
| Chi-square                       |      | 813.028  | Prob > chi2          |        | 0.000    |           |
| Akaike crit. (AIC)               |      | 3700.322 | Bayesian crit. (BIC) |        | 4290.916 |           |

\*\*\*  $p < 0.001$ , \*\*  $p < 0.01$ , \*  $p < 0.05$ . RCS: Restricted cubic spline with 5 knots.

**Supplementary Table S7.** Sensitivity analysis, with binary logistic regression with categorized age at death and incident year

|                                                     | OR   | SE   | Z     | P value | 95% CI LL | 95% CI UL | Sig level |
|-----------------------------------------------------|------|------|-------|---------|-----------|-----------|-----------|
| 10-year age group                                   |      |      |       |         |           |           |           |
| 5-14                                                | 1.00 | .    | .     | .       | .         | .         |           |
| 15-24                                               | 0.51 | 0.30 | -1.16 | 0.25    | 0.17      | 1.58      |           |
| 25-34                                               | 0.70 | 0.41 | -0.62 | 0.53    | 0.22      | 2.18      |           |
| 35-44                                               | 0.64 | 0.38 | -0.75 | 0.45    | 0.20      | 2.03      |           |
| 45-54                                               | 0.65 | 0.39 | -0.72 | 0.47    | 0.21      | 2.09      |           |
| 55-64                                               | 0.62 | 0.37 | -0.79 | 0.43    | 0.19      | 2.02      |           |
| 65-74                                               | 0.53 | 0.33 | -1.04 | 0.30    | 0.16      | 1.78      |           |
| 75 and over                                         | 0.50 | 0.31 | -1.10 | 0.27    | 0.14      | 1.72      |           |
| Incident year                                       |      |      |       |         |           |           |           |
| 2001 to 2005                                        | 1    | .    | .     | .       | .         | .         |           |
| 2006 to 2010                                        | 1.31 | 0.17 | 2.08  | 0.04    | 1.02      | 1.68      | *         |
| 2011 to 2015                                        | 0.98 | 0.13 | -0.16 | 0.87    | 0.75      | 1.27      |           |
| Sex                                                 |      |      |       |         |           |           |           |
| Male                                                | 1    | .    | .     | .       | .         | .         |           |
| Female                                              | 1.95 | 0.20 | 6.51  | < 0.001 | 1.59      | 2.38      | ***       |
| Indigenous status                                   |      |      |       |         |           |           |           |
| Non-Indigenous                                      | 1    | .    | .     | .       | .         | .         |           |
| Indigenous                                          | 0.61 | 0.15 | -2.02 | 0.04    | 0.38      | 0.98      | *         |
| Country of birth                                    |      |      |       |         |           |           |           |
| Australia                                           | 1    | .    | .     | .       | .         | .         |           |
| Elsewhere                                           | 1.18 | 0.14 | 1.44  | 0.15    | 0.94      | 1.48      |           |
| Marital status                                      |      |      |       |         |           |           |           |
| Married/De facto                                    | 1    | .    | .     | .       | .         | .         |           |
| Never married                                       | 0.84 | 0.17 | -0.83 | 0.41    | 0.56      | 1.26      |           |
| Separated                                           | 0.80 | 0.18 | -1.03 | 0.31    | 0.52      | 1.23      |           |
| Divorced                                            | 0.89 | 0.20 | -0.49 | 0.62    | 0.57      | 1.40      |           |
| Widowed                                             | 0.85 | 0.25 | -0.57 | 0.57    | 0.47      | 1.51      |           |
| Unknown                                             | 1.45 | 0.27 | 1.98  | 0.05    | 1.00      | 2.08      | *         |
| Single                                              | 0.90 | 0.19 | -0.51 | 0.61    | 0.59      | 1.36      |           |
| Remoteness area of residential address              |      |      |       |         |           |           |           |
| Major Cities of Australia                           | 1    | .    | .     | .       | .         | .         |           |
| Inner Regional Australia                            | 1.17 | 0.13 | 1.37  | 0.17    | 0.94      | 1.46      |           |
| Outer Regional Australia                            | 0.77 | 0.11 | -1.83 | 0.07    | 0.59      | 1.02      |           |
| Remote or Very Remote                               | 0.24 | 0.11 | -3.27 | < 0.001 | 0.10      | 0.57      | **        |
| Australia                                           |      |      |       |         |           |           |           |
| Employment status                                   |      |      |       |         |           |           |           |
| Unemployed                                          | 1    | .    | .     | .       | .         | .         |           |
| Full-time employment                                | 0.42 | 0.09 | -4.12 | < 0.001 | 0.27      | 0.63      | ***       |
| Part-time/casual employment                         | 0.41 | 0.14 | -2.69 | 0.01    | 0.22      | 0.79      | **        |
| Employed (unknown mode)                             | 0.70 | 0.12 | -2.03 | 0.04    | 0.50      | 0.99      | *         |
| On disability pension                               | 1.85 | 0.29 | 3.98  | < 0.001 | 1.37      | 2.51      | ***       |
| Retired                                             | 1.01 | 0.22 | 0.03  | 0.98    | 0.65      | 1.56      |           |
| Other not in labour force                           | 0.90 | 0.18 | -0.52 | 0.61    | 0.60      | 1.35      |           |
| Unknown                                             | 0.89 | 0.13 | -0.79 | 0.43    | 0.67      | 1.19      |           |
| Living arrangements                                 |      |      |       |         |           |           |           |
| With spouse                                         | 1    | .    | .     | .       | .         | .         |           |
| With friend/relative                                | 1.39 | .29  | 1.59  | 0.11    | 0.93      | 2.09      |           |
| With parents                                        | 1.44 | .33  | 1.58  | 0.11    | 0.92      | 2.25      |           |
| Other shared housing (nursing home, boarding house) | 2.16 | .66  | 2.52  | 0.01    | 1.19      | 3.94      | *         |
| Institution (e.g., hospital, prison)                | 1.00 | 0.49 | -0.00 | 1.00    | 0.38      | 2.64      |           |
| Alone                                               | 1.70 | 0.33 | 2.75  | 0.01    | 1.17      | 2.49      | **        |
| Homeless                                            | 4.17 | 1.74 | 3.42  | < 0.001 | 1.84      | 9.44      | ***       |
| Temporarily away from home                          | 0.85 | 0.47 | -0.29 | 0.77    | 0.29      | 2.50      |           |
| Unknown                                             | 1.03 | 0.22 | 0.12  | 0.90    | 0.68      | 1.55      |           |
| Depression                                          |      |      |       |         |           |           |           |
| No                                                  | 1    | .    | .     | .       | .         | .         |           |
| Depression mentioned                                | 0.96 | 0.14 | -0.26 | 0.79    | 0.72      | 1.28      |           |
| Diagnosed with                                      | 1.23 | 0.16 | 1.66  | 0.10    | 0.96      | 1.58      |           |
| Bipolar                                             |      |      |       |         |           |           |           |
| None known                                          | 1    | .    | .     | .       | .         | .         |           |

|                                                           |      |      |       |         |      |      |     |
|-----------------------------------------------------------|------|------|-------|---------|------|------|-----|
| Diagnosed with Anxiety                                    | 1.94 | 0.38 | 3.40  | < 0.001 | 1.32 | 2.84 | *** |
| None known                                                | 1    | .    | .     | .       | .    | .    |     |
| Diagnosed with Substance abuse                            | 1.37 | 0.21 | 2.03  | 0.04    | 1.01 | 1.86 | *   |
| None known                                                | 1    | .    | .     | .       | .    | .    |     |
| Yes                                                       | 1.86 | 0.28 | 4.15  | < 0.001 | 1.39 | 2.49 | *** |
| Dementia                                                  |      |      |       |         |      |      |     |
| None known                                                | 1    | .    | .     | .       | .    | .    |     |
| Dementia                                                  | 3.72 | 0.92 | 5.30  | < 0.001 | 2.29 | 6.06 | *** |
| Lifetime GP treatment for a psychiatric condition         |      |      |       |         |      |      |     |
| None known                                                | 1    | .    | .     | .       | .    | .    |     |
| Yes                                                       | 1.43 | 0.16 | 3.16  | < 0.001 | 1.15 | 1.78 | **  |
| Not applicable                                            | 1.38 | 0.74 | 0.61  | 0.54    | 0.49 | 3.94 |     |
| Lifetime inpatient treatment for a psychiatric condition  |      |      |       |         |      |      |     |
| None known                                                | 1    | .    | .     | .       | .    | .    |     |
| Yes, current                                              | 0.61 | 0.21 | -1.45 | 0.15    | 0.31 | 1.19 |     |
| Yes, past                                                 | 1.02 | 0.14 | 0.12  | 0.91    | 0.77 | 1.34 |     |
| Yes, unknown when                                         | 1.28 | 0.45 | 0.68  | 0.49    | 0.64 | 2.56 |     |
| Not applicable                                            | 0.79 | 0.66 | -0.28 | 0.78    | 0.15 | 4.09 |     |
| Lifetime outpatient treatment for a psychiatric condition |      |      |       |         |      |      |     |
| None known                                                | 1    | .    | .     | .       | .    | .    |     |
| Yes, current                                              | 0.9  | 0.13 | -0.71 | 0.48    | 0.68 | 1.20 |     |
| Yes, past                                                 | 1.00 | 0.22 | 0.01  | 0.99    | 0.65 | 1.54 |     |
| Yes, unknown when                                         | 0.91 | 0.25 | -0.34 | 0.73    | 0.53 | 1.57 |     |
| Other lifetime treatment for a psychiatric condition      |      |      |       |         |      |      |     |
| None known                                                | 1    | .    | .     | .       | .    | .    |     |
| Not applicable                                            | 0.92 | 0.70 | -0.11 | 0.91    | 0.21 | 4.12 |     |
| Yes, current                                              | 0.79 | 0.13 | -1.39 | 0.17    | 0.56 | 1.10 |     |
| Yes, past                                                 | 0.72 | 0.21 | -1.14 | 0.25    | 0.41 | 1.26 |     |
| Not applicable                                            | 1.04 | 0.81 | 0.05  | 0.96    | 0.22 | 4.80 |     |
| Yes, unknown when                                         | 0.70 | 0.24 | -1.07 | 0.29    | 0.36 | 1.35 |     |
| Lifetime intent                                           |      |      |       |         |      |      |     |
| Unknown                                                   | 1    | .    | .     | .       | .    | .    |     |
| Once or twice                                             | 1.03 | 0.19 | 0.16  | 0.87    | 0.72 | 1.47 |     |
| Several times                                             | 0.94 | 0.23 | -0.23 | 0.82    | 0.58 | 1.53 |     |
| No                                                        | 0.75 | 0.21 | -1.03 | 0.30    | 0.44 | 1.29 |     |
| 12-month intent                                           |      |      |       |         |      |      |     |
| Unknown                                                   | 1    | .    | .     | .       | .    | .    |     |
| Once or twice                                             | 0.61 | 0.11 | -2.64 | 0.01    | 0.42 | 0.88 | **  |
| Several times                                             | 0.44 | 0.13 | -2.75 | 0.01    | 0.25 | 0.79 | **  |
| No                                                        | 1.13 | 0.28 | 0.48  | 0.63    | 0.69 | 1.84 |     |
| Lifetime suicide attempt                                  |      |      |       |         |      |      |     |
| No                                                        | 1    | .    | .     | .       | .    | .    |     |
| Once or twice                                             | 1.15 | 0.23 | 0.70  | 0.48    | 0.78 | 1.71 |     |
| Several times (3-9)                                       | 1.28 | 0.39 | 0.84  | 0.40    | 0.71 | 2.31 |     |
| Numerous times (10 or more)                               | 1.18 | 0.81 | 0.24  | 0.81    | 0.31 | 4.53 |     |
| Yes (unknown times)                                       | 1.58 | 0.54 | 1.33  | 0.18    | 0.81 | 3.08 |     |
| Yes (multiple unknown times)                              | 1.49 | 0.59 | 1.00  | 0.32    | 0.68 | 3.25 |     |
| Unknown                                                   | 1.43 | .33  | 1.53  | 0.13    | 0.90 | 2.25 |     |
| 12-month suicide attempt                                  |      |      |       |         |      |      |     |
| No                                                        | 1    | .    | .     | .       | .    | .    |     |
| Once or twice                                             | 1.14 | 0.24 | 0.65  | 0.52    | 0.76 | 1.72 |     |
| Three or more times                                       | 0.87 | 0.36 | -0.34 | 0.73    | 0.38 | 1.97 |     |
| Yes (unknown times)                                       | 0.90 | 0.46 | -0.21 | 0.84    | 0.33 | 2.47 |     |
| Yes (multiple unknown times)                              | 1.03 | 0.87 | 0.04  | 0.97    | 0.20 | 5.41 |     |
| Unknown                                                   | 1.27 | 0.26 | 1.15  | 0.25    | 0.85 | 1.89 |     |
| Alcohol consumed before death                             |      |      |       |         |      |      |     |
| No                                                        | 1    | .    | .     | .       | .    | .    |     |
| Yes                                                       | 1.01 | 0.11 | 0.06  | 0.95    | 0.82 | 1.24 |     |
| Unknown                                                   | 0.88 | 0.14 | -0.80 | 0.42    | 0.64 | 1.20 |     |
| Relationship problems                                     |      |      |       |         |      |      |     |
| None known                                                | 1    | .    | .     | .       | .    | .    |     |
| Conflict                                                  | 0.73 | 0.13 | -1.79 | 0.07    | 0.52 | 1.03 |     |
| Separation                                                | 0.73 | 0.11 | -2.08 | 0.04    | 0.54 | 0.98 | *   |
| Experienced sexual abuse                                  |      |      |       |         |      |      |     |

|                                |         |                      |        |         |      |         |     |
|--------------------------------|---------|----------------------|--------|---------|------|---------|-----|
| None known                     | 1       | .                    | .      | .       | .    | .       |     |
| Yes                            | 0.46    | 0.20                 | -1.74  | 0.08    | 0.19 | 1.10    |     |
| Conflict                       |         |                      |        |         |      |         |     |
| None known                     | 1       | .                    | .      | .       | .    | .       |     |
| Familial                       | 0.75    | 0.14                 | -1.55  | 0.12    | 0.53 | 1.08    |     |
| Interpersonal                  | 0.71    | 0.19                 | -1.30  | 0.19    | 0.43 | 1.19    |     |
| Recent or pending unemployment |         |                      |        |         |      |         |     |
| None known                     | 1       | .                    | .      | .       | .    | .       |     |
| Yes                            | 0.75    | 0.15                 | -1.45  | 0.15    | 0.51 | 1.11    |     |
| Suicide note left              |         |                      |        |         |      |         |     |
| No                             | 1       | .                    | .      | .       | .    | .       |     |
| Yes                            | 0.14    | 0.02                 | -12.23 | < 0.001 | 0.10 | 0.19    | *** |
| Unknown                        | 0.97    | 0.20                 | -0.16  | 0.88    | 0.65 | 1.44    |     |
| Constant                       | 0.08    | 0.05                 | -3.99  | < 0.001 | 0.02 | 0.28    | *** |
| Mean dependent var             | 0.06    | SD dependent var     |        |         |      | 0.25    |     |
| Pseudo r-squared               | 0.18    | Number of obs        |        |         |      | 9096    |     |
| Chi-square                     | 802.84  | Prob > chi2          |        |         |      | 0.00    |     |
| Akaike crit. (AIC)             | 3712.51 | Bayesian crit. (BIC) |        |         |      | 4310.22 |     |

\*\*\*  $p < 0.001$ , \*\*  $p < 0.01$ , \*  $p < 0.05$
